# Supplementary material for: Super-regional land-use change and effects on the grassland specialist flora
Source: PubMed Central journal article supplement (PMC6110833; doi:10.1038/s41467-018-05991-y), 2018-08-27
Supplement: 41467_2018_5991_MOESM1_ESM.pdf [file 41467_2018_5991_MOESM1_ESM.pdf]

## SUPPLEMENTARY INFORMATION

### Super-regional land-use change and effects on the grassland specialist flora

Alistair G. Auffret, Adam Kimberley, Jan Plue, Emelie Waldén

**Supplementary Table 1.** Summary of landscape change in southern Sweden between 1940s-60s and 2016. Fraction change in arable, open and forest cover across the whole study area and the fraction of 6733 landscapes that decreased in heterogeneity across the time period.

|                               | Arable change | Open change | Forest change | Decreased heterogeneity |
|-------------------------------|---------------|-------------|---------------|-------------------------|
| All landscapes<br>(n= 6733)   | -0.19         | -0.17       | 0.11          | 0.67                    |
| Arable landscapes<br>(n=1683) | -0.11         | 0.58        | -0.03         | 0.34                    |
| Open landscapes<br>(n=1683)   | -0.29         | -0.55       | 0.38          | 0.94                    |
| Forest landscapes<br>(n=1683) | -0.34         | -0.15       | 0.05          | 0.72                    |

**Supplementary Table 2.** Full generalised linear model explaining species richness in 23 398 Swedish semi-natural grasslands including both landscape and local predictor variables plus the county in which the grassland is located, including 95% confidence intervals. All variables were standardised for comparison.

| Variable                                                                           | Estimate | Lower  | Upper  | Std. Error | t value | Pr(> t ) |
|------------------------------------------------------------------------------------|----------|--------|--------|------------|---------|----------|
| Intercept                                                                          | 2.028    | 1.988  | 2.067  | 0.020      | 100.526 | 0.000    |
| <i>Landscape</i>                                                                   |          |        |        |            |         |          |
| Present landscape open                                                             | 0.024    | 0.009  | 0.038  | 0.007      | 3.220   | 0.001    |
| Past landscape heterogeneity                                                       | -0.037   | -0.049 | -0.024 | 0.006      | -5.692  | 0.000    |
| Past landscape arable                                                              | -0.080   | -0.094 | -0.066 | 0.007      | -11.366 | 0.000    |
| <i>Local</i>                                                                       |          |        |        |            |         |          |
| Grassland area (log)                                                               | 0.178    | 0.162  | 0.195  | 0.009      | 20.863  | 0.000    |
| Grassland heterogeneity                                                            | 0.220    | 0.206  | 0.234  | 0.007      | 30.769  | 0.000    |
| Grassland open cover                                                               | 0.069    | 0.055  | 0.082  | 0.007      | 9.730   | 0.000    |
| Grassland improvement                                                              | -0.111   | -0.125 | -0.096 | 0.007      | -14.958 | 0.000    |
| Area Fennoscandian species-rich dry-mesic lowland grassland (log x + 1)            | 0.254    | 0.241  | 0.267  | 0.007      | 38.445  | 0.000    |
| Area Semi-natural dry grassland and shrubland on calcareous substrates (log x + 1) | 0.116    | 0.105  | 0.128  | 0.006      | 19.451  | 0.000    |
| <i>Region (baseline=Kronoberg)</i>                                                 |          |        |        |            |         |          |
| Blekinge                                                                           | -0.526   | -0.577 | -0.476 | 0.026      | -20.417 | 0.000    |
| Gotland                                                                            | -0.052   | -0.104 | 0.000  | 0.027      | -1.957  | 0.050    |
| Halland                                                                            | -0.301   | -0.351 | -0.252 | 0.025      | -11.870 | 0.000    |
| Jönköping                                                                          | -0.145   | -0.190 | -0.101 | 0.023      | -6.389  | 0.000    |
| Kalmar                                                                             | -0.013   | -0.060 | 0.033  | 0.024      | -0.563  | 0.574    |
| Skåne                                                                              | -0.289   | -0.356 | -0.223 | 0.034      | -8.473  | 0.000    |
| Sodermanland                                                                       | -0.169   | -0.234 | -0.105 | 0.033      | -5.179  | 0.000    |
| Stockholm                                                                          | -0.324   | -0.379 | -0.268 | 0.028      | -11.482 | 0.000    |
| Uppsala                                                                            | 0.109    | 0.067  | 0.151  | 0.021      | 5.097   | 0.000    |
| Värmland                                                                           | -0.013   | -0.060 | 0.034  | 0.024      | -0.533  | 0.594    |
| Västmanland                                                                        | -0.397   | -0.453 | -0.342 | 0.028      | -14.042 | 0.000    |
| Västra Götaland                                                                    | 0.003    | -0.043 | 0.049  | 0.024      | 0.108   | 0.914    |
| Örebro                                                                             | -0.171   | -0.214 | -0.128 | 0.022      | -7.763  | 0.000    |
| Östergötland                                                                       | -0.149   | -0.192 | -0.105 | 0.022      | -6.717  | 0.000    |

**Supplementary Table 3.** Generalised linear models using landscape, local or regional variables to explain species richness in 23 398 Swedish semi-natural grasslands, including 95% confidence intervals (three models). All variables were standardised for comparison.

| Variable                                                                           | Estimate | Lower | Upper  | Std. Error | t value | Pr(> t ) |
|------------------------------------------------------------------------------------|----------|-------|--------|------------|---------|----------|
| <i>Landscape model</i>                                                             |          |       |        |            |         |          |
| Intercept                                                                          | 1.945    | 0.004 | 1.937  | 1.953      | 498.958 | 0.000    |
| Present landscape open                                                             | 0.127    | 0.007 | 0.112  | 0.141      | 17.118  | 0.000    |
| Past landscape heterogeneity                                                       | 0.008    | 0.008 | -0.007 | 0.024      | 1.065   | 0.287    |
| Past landscape arable                                                              | -0.073   | 0.008 | -0.089 | -0.057     | -9.130  | 0.000    |
| <i>Local model</i>                                                                 |          |       |        |            |         |          |
| Intercept                                                                          | 1.910    | 0.003 | 1.903  | 1.917      | 547.183 | 0.000    |
| Grassland area (log)                                                               | 0.188    | 0.008 | 0.172  | 0.205      | 22.511  | 0.000    |
| Grassland heterogeneity                                                            | 0.200    | 0.007 | 0.186  | 0.214      | 27.345  | 0.000    |
| Grassland open cover                                                               | 0.047    | 0.007 | 0.033  | 0.061      | 6.544   | 0.000    |
| Grassland improvement                                                              | -0.116   | 0.008 | -0.130 | -0.101     | -15.271 | 0.000    |
| Area Fennoscandian species-rich dry-mesic lowland grassland (log x + 1)            | 0.273    | 0.006 | 0.260  | 0.286      | 42.107  | 0.000    |
| Area Semi-natural dry grassland and shrubland on calcareous substrates (log x + 1) | 0.139    | 0.006 | 0.128  | 0.150      | 24.145  | 0.000    |
| <i>Region model (baseline=Kronoberg)</i>                                           |          |       |        |            |         |          |
| Intercept                                                                          | 2.099    | 0.023 | 2.053  | 2.144      | 89.880  | 0.000    |
| Blekinge                                                                           | -0.542   | 0.030 | -0.600 | -0.483     | -18.219 | 0.000    |
| Gotland                                                                            | -0.100   | 0.031 | -0.160 | -0.039     | -3.244  | 0.001    |
| Halland                                                                            | -0.432   | 0.029 | -0.489 | -0.375     | -14.861 | 0.000    |
| Jönköping                                                                          | -0.214   | 0.026 | -0.265 | -0.162     | -8.125  | 0.000    |
| Kalmar                                                                             | -0.048   | 0.028 | -0.102 | 0.007      | -1.726  | 0.084    |
| Skåne                                                                              | -0.324   | 0.040 | -0.402 | -0.247     | -8.179  | 0.000    |
| Sodermanland                                                                       | -0.321   | 0.038 | -0.395 | -0.247     | -8.491  | 0.000    |
| Stockholm                                                                          | -0.452   | 0.033 | -0.516 | -0.389     | -13.914 | 0.000    |
| Uppsala                                                                            | 0.076    | 0.025 | 0.027  | 0.125      | 3.048   | 0.002    |
| Värmland                                                                           | -0.012   | 0.028 | -0.067 | 0.043      | -0.440  | 0.660    |
| Västmanland                                                                        | -0.394   | 0.033 | -0.457 | -0.330     | -12.054 | 0.000    |
| Västra Götaland                                                                    | 0.022    | 0.026 | -0.029 | 0.074      | 0.838   | 0.402    |
| Örebro                                                                             | -0.218   | 0.025 | -0.268 | -0.168     | -8.551  | 0.000    |
| Östergötland                                                                       | -0.139   | 0.025 | -0.189 | -0.089     | -5.504  | 0.000    |

**Supplementary Table 4.** Generalised linear model explaining species richness in 23 398 Swedish semi-natural grasslands including landscape variables plus the county in which the grassland is located, including 95% confidence intervals. All variables were standardised for comparison.

| Variable                     | Estimate | Lower  | Upper  | Std. Error | t value | Pr(> t ) |
|------------------------------|----------|--------|--------|------------|---------|----------|
| Intercept                    | 2.126    | 2.081  | 2.171  | 0.023      | 91.987  | 0.000    |
| <i>Landscape</i>             |          |        |        |            |         |          |
| Present landscape open       | 0.143    | 0.129  | 0.158  | 0.008      | 18.834  | 0.000    |
| Past landscape heterogeneity | -0.025   | -0.040 | -0.011 | 0.008      | -3.368  | 0.001    |
| Past landscape arable        | -0.109   | -0.125 | -0.093 | 0.008      | -13.535 | 0.000    |
| <i>Region</i>                |          |        |        |            |         |          |
| <i>(baseline=Kronoberg)</i>  |          |        |        |            |         |          |
| Blekinge                     | -0.576   | -0.634 | -0.518 | 0.030      | -19.490 | 0.000    |
| Gotland                      | -0.101   | -0.160 | -0.041 | 0.031      | -3.293  | 0.001    |
| Halland                      | -0.464   | -0.521 | -0.408 | 0.029      | -16.062 | 0.000    |
| Jönköping                    | -0.241   | -0.292 | -0.189 | 0.026      | -9.202  | 0.000    |
| Kalmar                       | -0.033   | -0.086 | 0.021  | 0.027      | -1.202  | 0.229    |
| Skåne                        | -0.303   | -0.380 | -0.227 | 0.039      | -7.747  | 0.000    |
| Sodermanland                 | -0.348   | -0.422 | -0.275 | 0.038      | -9.276  | 0.000    |
| Stockholm                    | -0.485   | -0.548 | -0.422 | 0.032      | -15.054 | 0.000    |
| Uppsala                      | 0.066    | 0.017  | 0.114  | 0.025      | 2.657   | 0.008    |
| Värmland                     | -0.003   | -0.057 | 0.051  | 0.028      | -0.124  | 0.901    |
| Västmanland                  | -0.448   | -0.512 | -0.384 | 0.033      | -13.741 | 0.000    |
| Västra Götaland              | -0.080   | -0.132 | -0.028 | 0.027      | -3.006  | 0.003    |
| Örebro                       | -0.237   | -0.286 | -0.187 | 0.025      | -9.406  | 0.000    |
| Östergötland                 | -0.204   | -0.253 | -0.154 | 0.025      | -8.094  | 0.000    |

**Supplementary Table 5.** Generalised linear model explaining species richness in 23 398 Swedish semi-natural grasslands including both local predictor variables and the county in which the grassland is located, including 95% confidence intervals. All variables were standardised for comparison.

| Variable                                                                           | Estimate | Lower  | Upper  | Std. Error | t value | Pr(> t ) |
|------------------------------------------------------------------------------------|----------|--------|--------|------------|---------|----------|
| Intercept                                                                          | 2.009    | 1.969  | 2.048  | 0.020      | 99.498  | 0.000    |
| <i>Local</i>                                                                       |          |        |        |            |         |          |
| Patch area (log)                                                                   | 0.179    | 0.162  | 0.196  | 0.008      | 21.164  | 0.000    |
| Patch heterogeneity                                                                | 0.226    | 0.212  | 0.241  | 0.007      | 31.612  | 0.000    |
| Grassland open cover                                                               | 0.071    | 0.057  | 0.085  | 0.007      | 10.128  | 0.000    |
| Grassland improvement                                                              | -0.120   | -0.135 | -0.106 | 0.007      | -16.336 | 0.000    |
| Area Fennoscandian species-rich dry-mesic lowland grassland (log x + 1)            | 0.250    | 0.237  | 0.263  | 0.007      | 38.135  | 0.000    |
| Area Semi-natural dry grassland and shrubland on calcareous substrates (log x + 1) | 0.120    | 0.109  | 0.132  | 0.006      | 20.703  | 0.000    |
| <i>County</i>                                                                      |          |        |        |            |         |          |
| <i>(baseline=Kronoberg)</i>                                                        |          |        |        |            |         |          |
| Blekinge                                                                           | -0.520   | -0.571 | -0.470 | 0.026      | -20.222 | 0.000    |
| Gotland                                                                            | -0.032   | -0.084 | 0.020  | 0.027      | -1.195  | 0.232    |
| Halland                                                                            | -0.264   | -0.313 | -0.214 | 0.025      | -10.411 | 0.000    |
| Jönköping                                                                          | -0.113   | -0.158 | -0.069 | 0.023      | -4.997  | 0.000    |
| Kalmar                                                                             | -0.013   | -0.059 | 0.034  | 0.024      | -0.544  | 0.587    |
| Skåne                                                                              | -0.298   | -0.365 | -0.231 | 0.034      | -8.703  | 0.000    |
| Sodermanland                                                                       | -0.127   | -0.191 | -0.064 | 0.033      | -3.904  | 0.000    |
| Stockholm                                                                          | -0.297   | -0.352 | -0.241 | 0.028      | -10.516 | 0.000    |
| Uppsala                                                                            | 0.124    | 0.082  | 0.166  | 0.021      | 5.773   | 0.000    |
| Värmland                                                                           | -0.015   | -0.062 | 0.032  | 0.024      | -0.624  | 0.533    |
| Västmanland                                                                        | -0.348   | -0.403 | -0.293 | 0.028      | -12.377 | 0.000    |
| Västra Götaland                                                                    | 0.038    | -0.007 | 0.084  | 0.023      | 1.633   | 0.103    |
| Örebro                                                                             | -0.162   | -0.205 | -0.118 | 0.022      | -7.322  | 0.000    |
| Östergötland                                                                       | -0.129   | -0.172 | -0.085 | 0.022      | -5.815  | 0.000    |

**Supplementary Table 6.** Generalised linear model explaining species richness in 23 398 Swedish semi-natural grasslands including landscape and local predictor variables including 95% confidence intervals. All variables were standardized for comparison.

| Variable                                                                           | Estimate | Lower  | Upper  | Std. Error | t value | Pr(> t ) |
|------------------------------------------------------------------------------------|----------|--------|--------|------------|---------|----------|
| Intercept                                                                          | 1.909    | 1.902  | 1.916  | 0.003      | 548.739 | 0.000    |
| <i>Landscape</i>                                                                   |          |        |        |            |         |          |
| Present landscape open                                                             | 0.002    | -0.013 | 0.016  | 0.007      | 0.225   | 0.822    |
| Past landscape heterogeneity                                                       | -0.010   | -0.023 | 0.003  | 0.007      | -1.471  | 0.141    |
| Past landscape arable                                                              | -0.071   | -0.085 | -0.057 | 0.007      | -10.160 | 0.000    |
| <i>Local</i>                                                                       |          |        |        |            |         |          |
| Grassland area (log)                                                               | 0.193    | 0.176  | 0.210  | 0.009      | 22.620  | 0.000    |
| Grassland heterogeneity                                                            | 0.196    | 0.182  | 0.210  | 0.007      | 26.818  | 0.000    |
| Grassland open cover                                                               | 0.050    | 0.036  | 0.064  | 0.007      | 6.967   | 0.000    |
| Grassland improvement                                                              | -0.105   | -0.120 | -0.090 | 0.008      | -13.770 | 0.000    |
| Area Fennoscandian species-rich dry-mesic lowland grassland (log x + 1)            | 0.274    | 0.261  | 0.287  | 0.007      | 41.513  | 0.000    |
| Area Semi-natural dry grassland and shrubland on calcareous substrates (log x + 1) | 0.139    | 0.127  | 0.151  | 0.006      | 23.191  | 0.000    |

---

**Supplementary Table 7.** Reclassification of present-day (2016) terrain map to match the historical dataset. Water in the historical dataset was added as a contemporary layer from the terrain map and therefore exactly matches the modern map. Valuable grasslands from the semi-natural grassland database (<http://www.sjv.se/tuva>) were added on top of the modern map as open land.

---

| <b>Historical Map</b> <sup>1,2</sup> | <b>Present-day map</b> [Swedish Terrain Map 2016:<br><a href="https://www.lantmateriet.se/sv/Kartor-och-geografisk-information/Kartor/oppna-data/hamta-oppna-geodata">https://www.lantmateriet.se/sv/Kartor-och-geografisk-information/Kartor/oppna-data/hamta-oppna-geodata</a> ] |
|--------------------------------------|------------------------------------------------------------------------------------------------------------------------------------------------------------------------------------------------------------------------------------------------------------------------------------|
| Arable                               | Arable land                                                                                                                                                                                                                                                                        |
|                                      | Fruit farm                                                                                                                                                                                                                                                                         |
| Open                                 | Other open land                                                                                                                                                                                                                                                                    |
|                                      | Group of buildings with courtyard                                                                                                                                                                                                                                                  |
|                                      | High-rise buildings                                                                                                                                                                                                                                                                |
|                                      | Low-rise buildings                                                                                                                                                                                                                                                                 |
|                                      | Industrial area                                                                                                                                                                                                                                                                    |
|                                      | Leisure homes                                                                                                                                                                                                                                                                      |
|                                      | Other open land with isolated trees                                                                                                                                                                                                                                                |
| Forest                               | Forest, coniferous and mixed                                                                                                                                                                                                                                                       |
|                                      | Deciduous                                                                                                                                                                                                                                                                          |
|                                      | forest                                                                                                                                                                                                                                                                             |
| Water                                | Water body                                                                                                                                                                                                                                                                         |
|                                      | Water body with unclear shoreline                                                                                                                                                                                                                                                  |

---

---

**Supplementary Table 8.** Fifty-six vascular plant taxa recorded as specialist species in Swedish semi-natural grasslands<sup>3</sup>.

---

|                                |                              |
|--------------------------------|------------------------------|
| <i>Ajuga pyramidalis</i>       | <i>Leontodon hispidus</i>    |
| <i>Antennaria dioica</i>       | <i>Leucanthemum vulgare</i>  |
| <i>Armeria maritima</i>        | <i>Linum catharticum</i>     |
| <i>Arnica montana</i>          | <i>Luzula multiflora</i>     |
| <i>Bistorta vivipara</i>       | <i>Lychnis flos-cuculi</i>   |
| <i>Botrychium spp.</i>         | <i>Nardus stricta</i>        |
| <i>Briza media</i>             | <i>Ophioglossum vulgatum</i> |
| <i>Cardamine pratensis</i>     | <i>Orchis mascula</i>        |
| <i>Carex hostiana</i>          | <i>Parnassia palustris</i>   |
| <i>Carex panicea</i>           | <i>Pedicularis sylvatica</i> |
| <i>Carlina vulgaris</i>        | <i>Pimpinella saxifraga</i>  |
| <i>Centaurium spp.</i>         | <i>Pinguicula vulgaris</i>   |
| <i>Cirsium heterophyllum</i>   | <i>Plantago media</i>        |
| <i>Crepis praemorsa</i>        | <i>Platanthera bifolia</i>   |
| <i>Dactylorhiza incarnata</i>  | <i>Polygala spp.</i>         |
| <i>Dactylorhiza maculata</i>   | <i>Primula farinosa</i>      |
| <i>Danthonia decumbens</i>     | <i>Primula veris</i>         |
| <i>Dianthus deltoides</i>      | <i>Pulsatilla vulgaris</i>   |
| <i>Epipactis palustris</i>     | <i>Rhinanthus spp.</i>       |
| <i>Euphrasia spp.</i>          | <i>Scorzonera humilis</i>    |
| <i>Filipendula vulgaris</i>    | <i>Succisa pratensis</i>     |
| <i>Galium verum</i>            | <i>Thymus serpyllum</i>      |
| <i>Gentiana pneumonanthe</i>   | <i>Trifolium fragiferum</i>  |
| <i>Gentianella campestris</i>  | <i>Triglochin maritimum</i>  |
| <i>Gymnadenia conopsea</i>     | <i>Triglochin palustre</i>   |
| <i>Helianthemum spp.</i>       | <i>Trollius europaeus</i>    |
| <i>Helictotrichon pratense</i> | <i>Veronica officinalis</i>  |
| <i>Hypochaeris maculata</i>    | <i>Veronica spicata</i>      |

---



**Supplementary Table 9.** Pearson correlation of local and landscape predictor variables in 46 796 Swedish semi-natural grasslands. Non-independence of corresponding past and present landscape variables (**bold blue**) and correlations between forest and both open and arable landscape cover (**bold green**), meant that landscape forest cover was not included in any analysis and arable and open land from only one time period was included in each model explaining grassland specialist richness. Hab. Dir. 1 & 2 refer to the fraction of grassland covered by Fennoscandian species-rich dry-mesic lowland grassland and Semi-natural dry grassland and shrubland on calcareous substrates, respectively.

|                        | Grassl.<br>Area (log) | Grassl.<br>Het. | Grassl.<br>Improv. | Grassl.<br>Open | Hab.<br>Dir. 1 | Hab.<br>Dir. 2 | Past<br>Landsc.<br>Arable | Present<br>Landsc.<br>Arable | Past<br>Landsc.<br>Open | Present<br>Landsc.<br>Open | Past<br>Landsc.<br>Forest | Present<br>Landsc.<br>Forest | Past<br>Landsc.<br>Het. | Present<br>Landsc.<br>Het. |
|------------------------|-----------------------|-----------------|--------------------|-----------------|----------------|----------------|---------------------------|------------------------------|-------------------------|----------------------------|---------------------------|------------------------------|-------------------------|----------------------------|
| Grassl. Area (log)     | 1                     | 0.4             | 0.07               | -0.03           | 0.32           | 0.3            | 0.08                      | 0.11                         | 0.02                    | 0.24                       | -0.22                     | -0.3                         | 0.08                    | 0.18                       |
| Grassl. Het.           | 0.4                   | 1               | 0.16               | 0.07            | 0.2            | 0.2            | 0.01                      | 0.03                         | 0.04                    | 0.14                       | -0.09                     | -0.14                        | 0.03                    | 0.07                       |
| Grassl. Improv.        | 0.07                  | 0.16            | 1                  | 0.05            | -0.03          | -0.05          | 0.13                      | 0.12                         | -0.06                   | -0.04                      | -0.04                     | -0.04                        | 0.01                    | 0.03                       |
| Grassl. Open           | -0.03                 | 0.07            | 0.05               | 1               | -0.02          | 0.14           | 0.04                      | 0.06                         | 0.08                    | 0.17                       | -0.12                     | -0.15                        | -0.03                   | 0                          |
| Hab. Dir. 1            | 0.32                  | 0.2             | -0.03              | -0.02           | 1              | -0.11          | 0.01                      | -0.01                        | -0.09                   | -0.14                      | 0.07                      | 0.09                         | 0.03                    | 0                          |
| Hab. Dir. 2            | 0.3                   | 0.2             | -0.05              | 0.14            | -0.11          | 1              | 0.05                      | 0.07                         | 0.25                    | 0.38                       | -0.25                     | -0.28                        | 0.01                    | 0.05                       |
| Past Landsc. Arable    | 0.08                  | 0.01            | 0.13               | 0.04            | 0.01           | 0.05           | 1                         | <b>0.95</b>                  | -0.27                   | 0.16                       | <b>-0.57</b>              | -0.62                        | -0.08                   | 0.26                       |
| Present Landsc. Arable | 0.11                  | 0.03            | 0.12               | 0.06            | -0.01          | 0.07           | <b>0.95</b>               | 1                            | -0.25                   | 0.12                       | -0.56                     | <b>-0.67</b>                 | -0.12                   | 0.25                       |
| Past Landsc. Open      | 0.02                  | 0.04            | -0.06              | 0.08            | -0.09          | 0.25           | -0.27                     | -0.25                        | 1                       | <b>0.33</b>                | <b>-0.27</b>              | 0.1                          | 0.25                    | -0.15                      |
| Present Landsc. Open   | 0.24                  | 0.14            | -0.04              | 0.17            | -0.14          | 0.38           | 0.16                      | 0.12                         | <b>0.33</b>             | 1                          | -0.34                     | <b>-0.57</b>                 | 0.1                     | 0.32                       |
| Past Landsc. Forest    | -0.22                 | -0.09           | -0.04              | -0.12           | 0.07           | -0.25          | <b>-0.57</b>              | -0.56                        | <b>-0.27</b>            | -0.34                      | 1                         | <b>0.81</b>                  | -0.33                   | -0.38                      |
| Present Landsc. Forest | -0.3                  | -0.14           | -0.04              | -0.15           | 0.09           | -0.28          | -0.62                     | <b>-0.67</b>                 | 0.1                     | <b>-0.57</b>               | <b>0.81</b>               | 1                            | -0.16                   | -0.53                      |
| Past Landsc. Het.      | 0.08                  | 0.03            | 0.01               | -0.03           | 0.03           | 0.01           | -0.08                     | -0.12                        | 0.25                    | 0.1                        | -0.33                     | -0.16                        | 1                       | <b>0.67</b>                |
| Present Landsc. Het.   | 0.18                  | 0.07            | 0.03               | 0               | 0              | 0.05           | 0.26                      | 0.25                         | -0.15                   | 0.32                       | -0.38                     | -0.53                        | <b>0.67</b>             | 1                          |

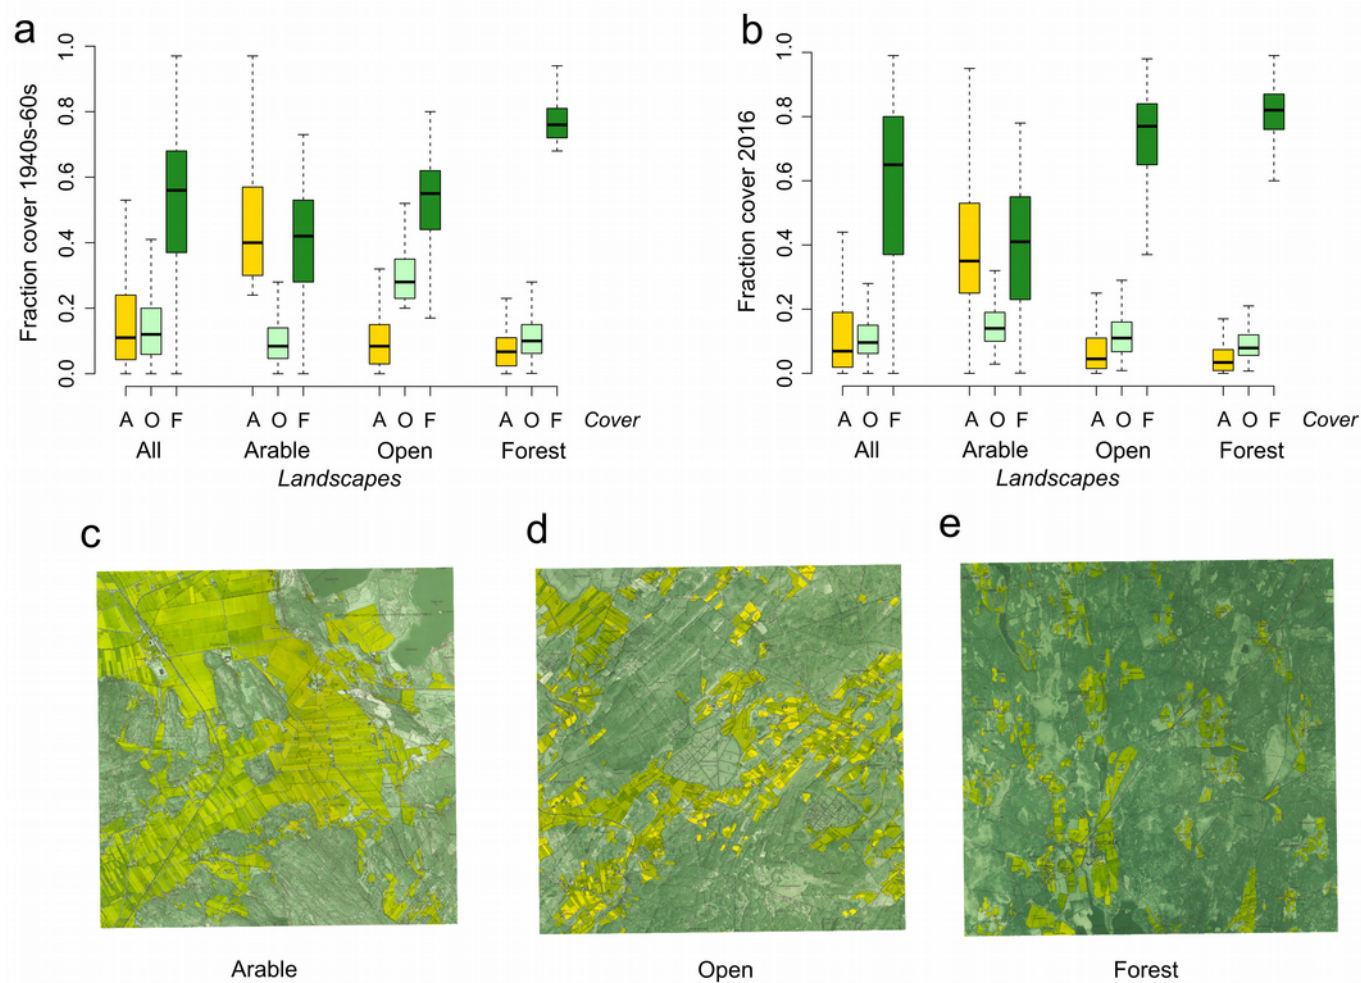

**Supplementary Figure 1.** Summary information of past and present Swedish landscapes. Fraction cover (median, interquartile range and range excluding outliers defined as quartiles  $\pm 1.5 \times$  the interquartile range) of arable (yellow), open (light green) and forest (dark green) in 1940s-60s [a] and 2016 [b] for all 46 796 landscapes and for arable, open and forest landscapes, defined as the landscapes with the top 25% ( $n=1683$ ) cover of each land-use category in the historical time period. Panels [c-e] show the landscape with the median cover of arable (yellow), open (light green) and forest (dark green) from each respective landscape type. Map images from Lantmäteriet's Historical Archive

## Supplementary Methods

### *Random forest exploratory analysis.*

The Swedish governmental database of valuable semi-natural grasslands (TUVA database – <http://www.sjv.se/tuva>) contains information on the presence and cover of 30 types of grassland habitat from the EU Habitat Directive (92/43/EEC) within each inventoried grassland, plus categories for “mosaic” and “other”. We considered it likely that the presence/amount of some of these habitats would have a positive effect on the number of grassland specialist species recorded in a grassland, but including all 32 did not seem like a sensible approach. In order to establish which grassland types have the strongest links to species richness, we ran a random forest model (using the `randomForest` function in the `randomForest` package in R<sup>4,5</sup>) containing number of grassland specialist species in all 46 796 grasslands as the response, with the areas of each of the 32 habitat categories and total grassland area (both in hectares) as explanatory variables. We used the default 500 trees and set the minimum terminal node size to 497 (1% of the total data) for computational efficiency. Based on the large differences in increase in node purity in relation to the remainder of the grassland types (see Supplementary Table 10, below), we chose to include Fennoscandian species-rich dry-mesic lowland grassland and Semi-natural dry grassland and shrubland on calcareous substrates for inclusion in the main analysis.

**Supplementary Table 10.** Degree by which the inclusion of 32 grassland habitat types increased explanatory power in a random forest model of species richness across grassland patches.

| Habitat type                                                                                   | Increase in Node Purity |
|------------------------------------------------------------------------------------------------|-------------------------|
| Fennoscandian species-rich dry-mesic lowland grassland                                         | 114642.0676             |
| Grassland area                                                                                 | 59556.05999             |
| Semi-natural dry grassland and shrubland on calcareous substrates                              | 49806.13931             |
| Molina meadows on calcareous, peaty or clayey-silt-laden soils                                 | 18256.36484             |
| Nordic alvar and precambrian calcareous flatrocks                                              | 14081.3205              |
| Species-rich extensively managed hay meadows                                                   | 11247.60234             |
| Mosaic                                                                                         | 9068.706872             |
| Alkaline fens                                                                                  | 5741.421328             |
| Species-rich <i>Nardus</i> grassland on silicious substrates in mountain areas                 | 5100.535326             |
| Fennoscandian wooded pastures                                                                  | 4211.358568             |
| Fennoscandian wooded meadows                                                                   | 2519.375989             |
| Cultivated grassland (often ex-arable field now grazed)                                        | 1811.680659             |
| Juniper grassland on heath/calc grassland                                                      | 1771.000579             |
| Boreal Baltic coastal meadows                                                                  | 1117.665739             |
| Rupicolous calcareous or basophilic grasslands of the Alysso-Sedion albi, Alvar                | 1111.18986              |
| Atlantic salt meadows ( <i>Glauco-Puccinellietalia maritimae</i> )                             | 787.7713811             |
| European dry heaths                                                                            | 721.4654355             |
| Siliceous rock with pioneer vegetation                                                         | 468.6912328             |
| Limestone pavements                                                                            | 178.4061936             |
| Oligotrophic to mesotrophic standing waters                                                    | 132.8451959             |
| Petrifying springs with tufa formation                                                         | 122.3724126             |
| Northern Atlantic wet heaths with <i>Erica tetralix</i>                                        | 97.5118702              |
| Fixed coastal dunes with herbaceous vegetation                                                 | 90.95857504             |
| <i>Salicornia</i> and other annuals colonizing mud and sand (glasswort mudflats and sandflats) | 80.53968206             |
| Inland dunes with open <i>Corynephorus</i> and <i>Agrostis</i> grasslands                      | 76.61248749             |
| Calcareous fens with <i>Cladium mariscus</i> and species of the <i>Caricion davallianae</i>    | 56.59538366             |
| Hydrophilous tall herb fringe communities of plains and of the montane to alpine levels        | 42.4547945              |
| Transition mires and quaking bogs                                                              | 22.59327521             |
| Xeric sand calcareous grasslands                                                               | 7.101046492             |
| Other                                                                                          | 0                       |
| Calcareous rocky slopes with chasmophytic vegetation                                           | 0                       |
| Large shallow inlets and bays                                                                  | 0                       |
| Dry sand heaths with <i>Calluna</i> and <i>Empetrum nigrum</i>                                 | 0                       |

## Supplementary References

1. Auffret, A. G. *et al.* HistMapR: Rapid digitization of historical land-use maps in R. *Methods Ecol. Evol.* **8**, 1453–1457 (2017).
2. Auffret, A. G. *et al.* Data from: HistMapR: Rapid digitization of historical land-use maps in R. Figshare <http://dx.doi.org/10.17045/sthlmuni.4649854> (2017).
3. Swedish Board of Agriculture. *Ängs- och betesmarks- inventeringen 2002–2004*. (Swedish Board of Agriculture, Jönköping, 2005).
4. Liaw, A. & Wiener, M. Classification and regression by randomForest. *R News* **2**, 18–22 (2002).
5. R Development Core Team. *R: A language and environment for statistical computing*. (R Foundation for Statistical Computing, Vienna, 2017).
